# Supplementary material
Source: publisher figshare collection journal article supplement (https://geolsoc.figshare.com/ndownloader/files/18541649)
Supplement: Supplementary file 1 [file 18541649]

## Sheet: Sheet1
Analysis	207Pb/235U	Uncertainty ± 2σ	206Pb/238U	Uncertainty ± 2σ	rho	Concordance(%)		207Pb/206Pb	Uncertainty ± 2σ	206Pb/238U	Uncertainty ± 2σ	Th/U ratio
Al Wafi Schist
JA43_01A	2.44647	0.07533	0.15698	0.00307	0.195236	50.8603		1848.2	58.69	940	17.12	1.00621
JA43_02A	1.35296	0.02789	0.14123	0.00196	0.359528	93.2647		913.1	41.11	851.6	11.09	1.27338
JA43_02B	1.1009	0.01948	0.10202	0.00134	0.423705	54.2674		1154.1	33.28	626.3	7.82	0.737543
JA43_03A	4.04762	0.06127	0.28593	0.00362	0.509979	96.8862		1673.2	25.59	1621.1	18.13	0.564909
JA43_05A	0.51577	0.01802	0.04713	0.00082	0.177005	25.1418		1180.9	69.84	296.9	5.06	N/A
JA43_06A	1.44196	0.02314	0.14855	0.00188	0.470346	94.9585		940.2	30.48	892.8	10.56	1.27258
JA43_07A	1.36388	0.02383	0.14396	0.00186	0.425624	97.3938		890.2	34.1	867	10.5	0.20202
JA43_08A	3.16552	0.05168	0.24822	0.0032	0.468165	96.7377		1477.5	28.94	1429.3	16.5	0.442003
JA43_09A	3.65432	0.06018	0.2568	0.00332	0.465039	87.5676		1682.7	28.43	1473.5	17.01	0.363104
JA43_10A	2.18718	0.10646	0.18505	0.00446	0.124697	82.1512		1332.3	96.56	1094.5	24.24	0.605639
JA43_11A	2.17929	0.0445	0.19171	0.00264	0.36683	89.9729		1256.6	38.44	1130.6	14.26	0.590695
JA43_12A	1.17863	0.02325	0.1049	0.00142	0.377049	52.1193		1233.9	37.22	643.1	8.27	0.742281
JA43_13A	0.59002	0.01353	0.03831	0.00055	0.31393	13.2655		1827.3	41.05	242.4	3.41	0.43377
JA43_14A	1.5557	0.05996	0.13862	0.0026	0.161405	67.9743		1231.2	76.52	836.9	14.74	0.939887
JA43_15A	1.30104	0.02647	0.12508	0.00169	0.35623	70.3453		1080.1	39.53	759.8	9.7	0.904456
JA43_16A	1.34635	0.02852	0.14153	0.00195	0.348022	94.906		899.1	42.42	853.3	10.99	0.856478
JA43_17A	0.90836	0.0189	0.09254	0.00127	0.36183	59.2174		963.4	41.12	570.5	7.5	0.306955
JA43_17B	1.28437	0.02421	0.13685	0.00181	0.3979	94.969		870.6	37.23	826.8	10.26	1.01582
JA43_18A	1.03548	0.41673	-0.13695	0.24569	-0.199088	N/A		0.1	0	-949.4	1835.16	0.47938
JA43_19A	2.13346	0.0531	0.1448	0.00224	0.280183	49.9084		1746.6	45.7	871.7	12.63	N/A
JA43_20A	1.59595	0.03229	0.16328	0.00221	0.369787	102.169		954.3	39.81	975	12.27	0.67999
JA43_21A	1.39344	0.03262	0.14501	0.00193	0.328602	94.932		919.5	46.16	872.9	10.89	0.494244
JA43_22A	3.91168	0.08304	0.2753	0.00367	0.369627	93.3151		1679.9	37.32	1567.6	18.57	0.660547
JA43_23A	8.77261	0.15632	0.38616	0.00495	0.449409	84.0252		2505.2	27.69	2105	23.01	0.716456
JA43_24A	4.76379	0.08367	0.25986	0.0033	0.456026	69.6655		2137.5	28.24	1489.1	16.88	0.526336
JA43_25A	2.09031	0.04698	0.18885	0.00252	0.346789	92.6163		1204	42.33	1115.1	13.64	0.581368
JA43_27A	1.37772	0.03112	0.14213	0.00188	0.3438	91.3911		937.4	44.23	856.7	10.61	1.20918
JA43_28A	1.46524	0.03483	0.14892	0.002	0.330364	92.4579		967.9	46.59	894.9	11.2	0.911075
JA43_30A	1.3962	0.02956	0.14428	0.00188	0.36785	93.0292		933.9	41.13	868.8	10.61	1.03968
JA43_31A	2.48793	0.05624	0.19164	0.00258	0.343295	74.785		1511.4	40.91	1130.3	13.95	0.183451
JA43_32A	1.25969	0.02881	0.1269	0.00168	0.337716	78.1136		986	44.52	770.2	9.63	0.935911
JA43_33A	1.4957	0.03597	0.15182	0.00204	0.319051	93.8801		970.6	47.15	911.2	11.42	0.540605
JA43_34A	2.09138	0.04385	0.18658	0.00244	0.380506	89.7461		1228.8	38.97	1102.8	13.27	1.23714
JA43_35A	2.39339	0.05337	0.19104	0.00255	0.353237	78.0525		1443.9	40.59	1127	13.82	0.838353
JA43_36A	1.24967	0.02539	0.12306	0.00159	0.386366	72.493		1032.1	38.66	748.2	9.15	0.432478
JA43_38A	1.72503	0.03577	0.16484	0.00215	0.377887	90.0238		1092.6	39.21	983.6	11.88	1.47764
JA43_39A	1.29111	0.02949	0.13267	0.00176	0.345379	84.9302		945.6	44.67	803.1	10	0.420445
JA43_41A	2.69844	0.10001	0.14217	0.00248	0.181675	38.9819		2198.2	64.54	856.9	13.98	0.694338
JA43_43A	1.4869	0.03819	0.14798	0.00202	0.29775	88.0008		1010.9	50.25	889.6	11.33	0.134921
JA43_44A	1.32603	0.02918	0.12761	0.00168	0.357311	71.7782		1078.6	41.92	774.2	9.58	0.511556
JA43_45A	1.31607	0.03008	0.13876	0.00183	0.34539	93.8284		892.8	44.97	837.7	10.38	0.580632
JA43_46A	1.68699	0.05436	0.15027	0.00223	0.23378	73.2489		1232.1	61.88	902.5	12.48	0.346238
JA43_47A	1.61389	0.05026	0.13644	0.00201	0.238349	61.8159		1333.8	59.1	824.5	11.41	0.214502
JA43_48A	12.3301	0.25896	0.48109	0.00628	0.381233	93.5526		2706.5	32.7	2532	27.34	0.448066
JA43_49A	1.36839	0.02997	0.10601	0.00139	0.363905	43.2836		1500.8	39.27	649.6	8.11	0.518732
JA43_49B	1.34627	0.03372	0.14049	0.0019	0.313346	92.7032		914.1	49.54	847.4	10.72	1.20991
JA43_50A	4.33237	0.09969	0.29067	0.00389	0.34394	93.0373		1768	40.18	1644.9	19.41	0.520963
JA43_51A	1.06778	0.02454	0.08528	0.00113	0.343616	36.5533		1443.1	41.75	527.5	6.72	0.465099
JA43_52A	1.34211	0.0355	0.1426	0.00195	0.296732	97.9818		877	52.82	859.3	11	1.27938
JA43_53A	1.38333	0.0351	0.14564	0.00197	0.307388	97.8237		896	50.33	876.5	11.09	0.917708
JA43_53B	1.37456	0.03803	0.13387	0.00186	0.280743	76.8042		1054.5	54.3	809.9	10.58	0.640029
JA43_54A	1.43006	0.03665	0.15048	0.00204	0.303729	100.725		897.1	50.84	903.6	11.43	0.741394
JA43_55A	1.41516	0.03402	0.13458	0.0018	0.330315	73.8097		1102.7	45.95	813.9	10.21	0.564965
JA43_56A	1.34192	0.02277	0.13664	0.00171	0.454123	85.6432		964	31.97	825.6	9.69	1.2326
JA43_57A	1.37446	0.02203	0.1403	0.00174	0.483881	88.2482		959	29.88	846.3	9.82	0.38468
JA43_58A	1.24061	0.01885	0.12901	0.00159	0.516191	84.9386		920.9	28.11	782.2	9.06	0.67847
JA43_59A	1.32744	0.02326	0.14048	0.00176	0.437544	95.7731		884.8	33.63	847.4	9.96	0.596943
JA43_60A	2.71794	0.03897	0.17499	0.00214	0.546728	56.4203		1842.6	23.04	1039.6	11.74	0.746723
JA43_61A	1.44288	0.02663	0.14385	0.00182	0.409273	86.0377		1007	35.19	866.4	10.24	0.0897242
JA43_62A	1.30845	0.0217	0.138	0.00171	0.464732	93.4514		891.8	31.54	833.4	9.7	0.430977
JA43_63A	1.32048	0.02186	0.13781	0.00171	0.4649	91.1111		913.5	31.38	832.3	9.68	0.743884
JA43_64A	1.10629	0.02849	0.1132	0.00153	0.278641	72.4557		954.1	51.28	691.3	8.87	0.77175
JA43_65A	1.31671	0.02327	0.13893	0.00174	0.427632	94.1295		890.9	34.08	838.6	9.83	0.584099
JA43_66A	1.0855	0.01636	0.09912	0.00121	0.510519	51.5134		1182.8	26.9	609.3	7.12	1.01296
JA43_67A	1.38186	0.02404	0.13841	0.00173	0.434121	83.7794		997.5	32.93	835.7	9.79	1.01822
JA43_68A	1.32343	0.02889	0.13265	0.00173	0.340147	80.6063		996.2	42.66	803	9.84	0.381667
JA43_69A	1.23191	0.02277	0.12993	0.00163	0.408493	88.3145		891.7	35.95	787.5	9.31	0.148467
JA43_70A	3.22224	0.05887	0.22727	0.00292	0.417169	78.7756		1675.9	31.75	1320.2	15.34	0.447401
JA43_71A	9.7084	0.14485	0.45192	0.00556	0.514381	99.7138		2410.7	22.94	2403.8	24.69	0.199607
JA43_72A	1.4225	0.02563	0.14869	0.00186	0.414867	98.1654		910.3	34.84	893.6	10.43	1.57469
JA43_73A	1.30428	0.02256	0.13743	0.00171	0.439611	92.8835		893.7	33.32	830.1	9.67	0.314919
JA43_74A	1.32172	0.02257	0.14001	0.00173	0.441181	95.6842		882.8	32.89	844.7	9.8	0.368394
JA43_75A	1.36556	0.02528	0.14005	0.00177	0.405902	89.0223		949.2	35.73	845	9.98	0.289261
JA43_76A	1.31117	0.02414	0.14221	0.00178	0.411164	102.831		833.6	36.17	857.2	10.06	0.798907
JA43_76B	1.25029	0.02768	0.13056	0.00171	0.336804	86.7149		912.3	43.88	791.1	9.75	0.287476
JA43_77A	1.28555	0.02184	0.13537	0.00166	0.430152	91.472		894.7	32.87	818.4	9.44	0.0622025
JA43_78A	1.33036	0.02683	0.14218	0.00181	0.359628	99.1554		864.3	40.06	857	10.2	0.803627
JA43_79A	0.33828	0.00598	0.02799	0.00035	0.415623	12.9473		1374.8	32.07	178	2.18	0.425651
JA43_80A	1.2404	0.03024	0.11058	0.00146	0.283305	54.9585		1230.2	46.69	676.1	8.49	0.623581
JA43_81A	1.54704	0.06565	0.14582	0.00243	0.152418	78.4182		1119	83.71	877.5	13.7	1.60379
JA43_82A	1.50243	0.05807	0.14372	0.00229	0.172549	79.4366		1089.8	76.66	865.7	12.9	0.762985
JA43_83A	6.19206	0.33017	0.24875	0.00873	0.200637	54.0704		2648.4	92.56	1432	45.05	0.577688
JA43_84A	1.3352	0.03078	0.13455	0.00175	0.302391	82.6025		985.2	45.69	813.8	9.96	0.405667
JA43_85A	1.49115	0.03142	0.14818	0.00189	0.331997	87.9096		1013.2	40.96	890.7	10.63	0.39048
JA43_86A	1.45954	0.03377	0.14259	0.00187	0.301514	81.9865		1048.1	45.41	859.3	10.57	0.896283
JA43_87A	1.36689	0.02686	0.13708	0.00172	0.363516	83.268		994.5	38.38	828.1	9.74	0.649676
JA43_87B	1.33441	0.02858	0.13872	0.00176	0.32273	90.9427		920.8	42.7	837.4	9.98	0.834461
Ayn Formation, Mirbat
MR14-001	1.26058	0.02914	0.1302	0.00209	0.435695	84.4211		934.6	43.81	789	11.93	0.458193
MR14-002	1.2574	0.0202	0.13853	0.00206	0.678237	104.406		801.1	25.91	836.4	11.67	0.507974
MR14-003	1.1984	0.04009	0.13244	0.00242	0.278255	100.843		795.1	68.51	801.8	13.8	1.10473
MR14-004	1.19259	0.0422	0.13079	0.00246	0.257732	97.7789		810.4	72.64	792.4	14	0.976425
MR14-005	1.19789	0.02381	0.1309	0.00205	0.546451	96.9082		818.3	35.73	793	11.66	0.687229
MR14-006	1.06175	0.03681	0.11841	0.00223	0.268279	92.9041		776.5	71.28	721.4	12.87	1.04111
MR14-007	1.04008	0.02214	0.11925	0.00193	0.497997	101.283		717	40.52	726.2	11.1	0.815672
MR14-008	1.16546	0.03233	0.13179	0.00224	0.368879	106.927		746.4	55.42	798.1	12.78	0.453629
MR14-009	1.26148	0.03998	0.13638	0.00248	0.316369	98.049		840.6	63.67	824.2	14.07	0.317901
MR14-010	0.85023	0.01734	0.09026	0.00141	0.527217	63.3963		878.6	36.89	557	8.36	1.36187
MR14-011	0.93282	0.01714	0.09805	0.00151	0.598745	67.0671		899.1	31.35	603	8.85	1.28306
MR14-012	1.15874	0.02271	0.13003	0.00202	0.560161	103.317		762.7	35.11	788	11.55	0.696784
MR14-013	1.05363	0.01921	0.11725	0.0018	0.610995	91.593		780.3	31.42	714.7	10.38	1.03478
MR14-014	1.18759	0.02333	0.13088	0.00206	0.564767	99.0259		800.7	34.95	792.9	11.72	0.842484
MR14-015	1.17397	0.03024	0.12793	0.00218	0.403644	94.1405		824.3	50.16	776	12.46	0.654184
MR14-016	1.21885	0.0264	0.13409	0.00213	0.491948	100.921		803.8	40.57	811.2	12.12	0.886699
MR14-017	1.18492	0.02243	0.13108	0.00202	0.573017	100.227		792.2	33.44	794	11.51	0.676786
MR14-018	1.18796	0.02185	0.13036	0.002	0.594314	97.6511		808.9	31.88	789.9	11.39	0.244301
MR14-019	1.14123	0.02562	0.12737	0.00203	0.464982	99.8708		773.8	42.68	772.8	11.6	1.25562
MR14-020	0.97782	0.02938	0.1129	0.00203	0.296479	98.3177		701.4	62.76	689.6	11.76	0.876915
MR14-021	1.14015	0.02107	0.12622	0.00193	0.589031	96.9141		790.7	32.37	766.3	11.02	0.866369
MR14-022	1.00693	0.01993	0.1279	0.00195	0.546185	156.822		494.7	37.46	775.8	11.15	0.773129
MR14-023	1.14227	0.02453	0.12712	0.002	0.486612	98.9482		779.6	40.33	771.4	11.46	0.854295
MR14-024	1.18944	0.02314	0.13019	0.002	0.550016	96.8811		814.4	34.9	789	11.42	0.60374
MR14-025	1.18999	0.02437	0.12709	0.00197	0.522176	89.0943		865.6	37.26	771.2	11.29	0.641553
MR14-026	1.21584	0.02712	0.1319	0.00209	0.464894	95.8708		833.1	42.07	798.7	11.91	1.61709
MR14-027	0.44351	0.00876	0.04419	0.00068	0.53826	27.6615		1007.9	34.79	278.8	4.2	1.43068
MR14-028	1.21124	0.02585	0.12923	0.00202	0.492131	90.2951		867.6	39.54	783.4	11.54	0.80821
MR14-029	0.87167	0.01862	0.10315	0.00163	0.439276	97.4888		649.1	42.81	632.8	9.51	0.958015
MR14-030	1.19711	0.02471	0.12842	0.00199	0.506897	90.9494		856.3	37.86	778.8	11.36	0.993298
MR14-031	1.17412	0.0496	0.13184	0.00267	0.207449	104.942		760.8	87.9	798.4	15.19	1.17494
MR14-032	1.20252	0.0277	0.13311	0.00214	0.449119	101.807		791.3	44.1	805.6	12.16	0.319373
MR14-033	1.19059	0.0222	0.13169	0.00201	0.586597	100.593		792.8	32.73	797.5	11.46	0.801095
MR14-034	1.15634	0.02302	0.12831	0.00199	0.538823	98.9699		786.3	36.09	778.2	11.39	1.31357
MR14-035	1.16937	0.02387	0.13228	0.00208	0.524567	107.374		745.9	37.77	800.9	11.82	0.706385
MR14-036	1.18528	0.02354	0.13069	0.00204	0.544875	98.9997		799.8	35.96	791.8	11.66	0.953811
MR14-037	1.18525	0.02294	0.13143	0.00204	0.57071	101.067		787.6	34.2	796	11.61	0.572919
MR14-038	1.07517	0.0221	0.12347	0.00193	0.530751	105.156		713.7	37.77	750.5	11.09	1.11371
MR14-039	1.13975	0.04349	0.1287	0.00249	0.246147	104.151		749.3	78.9	780.4	14.2	1.36302
MR14-040	1.21214	0.02616	0.1308	0.00208	0.510283	93.8418		844.4	39.43	792.4	11.86	0.9375
MR14-041	1.21311	0.03158	0.12897	0.00225	0.413892	89.2796		875.9	50.26	782	12.85	0.452375
MR14-042	1.16666	0.02653	0.12953	0.00213	0.490638	99.9873		785.3	42.61	785.2	12.15	0.666997
MR14-043	1.15213	0.02385	0.12936	0.00208	0.548023	102.927		761.9	37.4	784.2	11.86	0.536773
MR14-044	1.05521	0.02297	0.11981	0.00195	0.51114	98.8215		738.2	40.39	729.5	11.24	1.05639
MR14-045	1.13472	0.02758	0.12802	0.00215	0.454963	103.312		751.7	46.52	776.6	12.29	0.563063
MR14-046	1.19206	0.02344	0.13596	0.00218	0.572162	112.807		728.5	35.14	821.8	12.4	1.00329
MR14-047	1.13203	0.02208	0.12825	0.00205	0.572025	104.739		742.7	34.79	777.9	11.69	0.759791
MR14-048	1.20626	0.0309	0.13502	0.00231	0.430225	106.247		768.4	49.7	816.4	13.11	0.744541
MR14-049	1.12954	0.02788	0.12591	0.00214	0.454217	98.3406		777.4	47.24	764.5	12.25	0.630237
MR14-050	1.13719	0.03612	0.1212	0.00226	0.326361	84.702		870.7	63.32	737.5	13.01	0.808907
MR14-051	1.18702	0.0242	0.12858	0.00209	0.557481	93.1541		837	36.37	779.7	11.94	0.973896
MR14-052	1.15975	0.03426	0.12523	0.00223	0.354716	90.1719		843.5	58.31	760.6	12.78	1.0127
MR14-053	1.13886	0.02307	0.12598	0.00202	0.562282	96.4443		793.1	36.06	764.9	11.56	0.580304
MR14-054	1.07072	0.02989	0.12172	0.00211	0.382313	100.694		735.4	55.49	740.5	12.14	0.804658
MR14-055	1.16461	0.02924	0.12724	0.00216	0.430041	94.2735		819	48.21	772.1	12.33	1.00557
MR14-056	1.11142	0.02025	0.12322	0.00193	0.634401	95.0152		788.4	30.5	749.1	11.09	0.982524
MR14-057	1.14031	0.028	0.12232	0.00208	0.447531	86.7522		857.5	46.45	743.9	11.96	0.943653
MR14-058	1.16091	0.0247	0.12713	0.00209	0.49967	94.7905		813.9	39.88	771.5	11.94	0.917366
MR14-059	1.05016	0.02443	0.10846	0.00183	0.478963	70.9567		935.5	42.87	663.8	10.62	1.0912
MR14-060	1.10836	0.01975	0.12102	0.0019	0.642511	89.7939		820.1	29.52	736.4	10.91	0.927868
MR14-061	1.20865	0.02465	0.13278	0.00215	0.559597	99.5048		807.7	36.31	803.7	12.25	0.645786
MR14-062	0.97773	0.02354	0.11144	0.0019	0.445517	93.2503		730.4	46.92	681.1	11.01	0.791489
MR14-063	1.18955	0.03377	0.13541	0.00237	0.377732	111.724		732.7	56.5	818.6	13.44	0.289457
MR14-064	1.23937	0.02345	0.13576	0.00215	0.612295	100.86		813.6	32.16	820.6	12.23	0.32465
MR14-065	1.1599	0.02672	0.13062	0.00214	0.476656	104.78		755.3	43.53	791.4	12.22	0.791048
MR14-066	1.17328	0.02339	0.12888	0.00205	0.572081	96.7802		807.5	35.24	781.5	11.69	0.721553
MR14-067	1.18059	0.04214	0.12374	0.00245	0.277891	83.0774		905.3	71.94	752.1	14.07	0.889401
MR14-068	1.17065	0.02636	0.12908	0.00211	0.488198	97.8739		799.6	41.96	782.6	12.04	1.05015
MR14-069	1.17692	0.02638	0.12838	0.00212	0.506702	94.7087		822.1	41.26	778.6	12.12	0.846177
MR14-070	1.28373	0.02383	0.1354	0.00212	0.621092	91.7816		891.9	31.07	818.6	12.05	0.833673
MR14-071	1.07074	0.01974	0.11737	0.00183	0.624702	88.1252		811.8	31.12	715.4	10.58	0.877463
MR14-072	1.22669	0.02344	0.13219	0.00208	0.598691	94.4648		847.3	32.82	800.4	11.85	0.832097
MR14-073	1.15707	0.03038	0.13011	0.00225	0.419489	103.969		758.4	51.19	788.5	12.82	0.50716
MR14-074	1.16411	0.02539	0.12989	0.00211	0.513601	101.627		774.6	40.2	787.2	12.05	1.00422
MR14-075	1.21205	0.03179	0.13228	0.00226	0.413838	97.5636		820.9	50.83	800.9	12.86	1.23282
MR14-076	1.18869	0.02391	0.12675	0.00202	0.565741	88.4965		869.3	35.38	769.3	11.56	0.972826
MR14-077	1.1656	0.02258	0.12979	0.00205	0.588199	101.014		778.8	33.86	786.7	11.7	0.650354
MR14-078	1.15907	0.02435	0.13136	0.00211	0.532547	107.282		741.6	38.43	795.6	12.01	0.848345
MR14-079	1.13656	0.02108	0.12506	0.00196	0.618375	94.4894		803.9	31.46	759.6	11.21	0.502253
MR14-080	1.16423	0.02099	0.13004	0.00202	0.637047	102.033		772.4	30.17	788.1	11.52	0.706125
MR14-081	1.16782	0.02453	0.12913	0.00207	0.531541	98.6517		793.6	38.16	782.9	11.82	0.704222
MR14-082	0.70538	0.01227	0.07242	0.00112	0.649304	47.5823		947.2	28.1	450.7	6.75	0.802294
MR14-083	1.14852	0.02317	0.12518	0.00199	0.554836	92.3142		823.6	35.84	760.3	11.4	0.694048
MR14-084	1.15679	0.03241	0.13025	0.00229	0.378495	104.502		755.3	55.59	789.3	13.04	1.08836
MR14-085	1.15593	0.02277	0.12885	0.00204	0.582312	100.618		776.5	34.63	781.3	11.68	0.902839
MR14-086	1.22052	0.02404	0.13357	0.00212	0.582735	99.1535		815.1	34.43	808.2	12.07	1.89762
MR14-087	1.20036	0.02275	0.13174	0.00207	0.601864	98.6034		809.1	32.66	797.8	11.79	0.570273
MR14-088	1.13182	0.02782	0.1293	0.00215	0.439275	108.199		724.5	47.64	783.9	12.29	0.689399
MR14-089	1.11428	0.02751	0.12884	0.00214	0.437063	111.76		699	48.07	781.2	12.25	1.04259
MR14-090	N/A	N/A	N/A	N/A	N/A	N/A		N/A	N/A	N/A	N/A	N/A
MR14-091	1.22989	0.03263	0.1345	0.00235	0.412944	99.6082		816.7	51.52	813.5	13.37	0.58153
MR14-092	N/A	N/A	N/A	N/A	N/A	N/A		N/A	N/A	N/A	N/A	N/A
MR14-093	1.11909	0.02133	0.1255	0.00202	0.592954	99.7905		763.8	33.39	762.2	11.57	0.666237
MR14-094	1.22393	0.02361	0.13405	0.00215	0.603123	99.6804		813.5	33.01	810.9	12.19	0.859286
MR14-095	1.22015	0.02268	0.13399	0.00214	0.609875	100.347		807.8	32.03	810.6	12.16	0.612348
MR14-096	1.22126	0.02822	0.12737	0.00215	0.476895	84.4682		914.9	43.04	772.8	12.28	1.01041
MR14-097	1.23573	0.02919	0.13745	0.00229	0.475969	106.3		781	44.57	830.2	12.96	0.647355
MR14-098	1.52222	0.03475	0.15705	0.00261	0.490137	100.352		937.1	41.63	940.4	14.53	0.607858
MR14-099	1.25064	0.025	0.13953	0.00225	0.57907	108.687		774.7	35.31	842	12.73	0.282723
MR14-100	1.23748	0.0248	0.13538	0.00219	0.567044	100.331		815.8	35.43	818.5	12.42	0.747106
MR14-101	1.15852	0.02978	0.12881	0.00222	0.42717	99.8977		781.9	49.79	781.1	12.68	0.856583
MR14-102	1.15606	0.03005	0.12655	0.00219	0.419468	94.2917		814.6	50.39	768.1	12.54	1.04138
MR14-103	1.12335	0.0264	0.12607	0.0021	0.485908	100.407		762.3	44.21	765.4	12.02	0.789844
MR14-104	1.15635	0.02294	0.12679	0.00204	0.580944	94.8829		811	34.69	769.5	11.66	0.789531
MR14-105	1.16869	0.02796	0.13038	0.00219	0.461183	101.962		774.8	45.46	790	12.49	0.758501
MR14-106	1.14085	0.02464	0.12784	0.00208	0.526467	101.333		765.3	39.41	775.5	11.91	0.827879
MR14-107	1.16044	0.0243	0.12907	0.00209	0.54218	100.179		781.1	37.76	782.5	11.96	0.647938
MR14-108	1.44255	0.03689	0.16057	0.00271	0.415042	123.127		779.6	49.71	959.9	15.05	1.065
MR14-109	1.07331	0.0252	0.12288	0.00203	0.442205	103.663		720.7	46.03	747.1	11.67	1.02087
MR14-110	1.13458	0.02506	0.12326	0.00201	0.470633	90.1902		830.8	41.76	749.3	11.52	0.715743
MR14-111	1.13138	0.02882	0.11917	0.00199	0.415806	81.1131		894.8	48.81	725.8	11.46	0.681228
MR14-112	1.14244	0.0322	0.12877	0.00227	0.376162	103.747		752.7	56.22	780.9	12.94	1.0783
MR14-113	1.09932	0.02449	0.12213	0.002	0.495807	94.8296		783.3	41.68	742.8	11.47	0.761099
MR14-114	1.21285	0.04125	0.13042	0.0024	0.28979	92.78		851.8	68.51	790.3	13.66	0.40748
MR14-115	1.11372	0.04172	0.12624	0.00241	0.244509	103.344		741.6	77.71	766.4	13.81	1.02833
MR14-116	1.10261	0.02567	0.12283	0.00201	0.464646	96.0144		777.8	44.25	746.8	11.56	0.75943
MR14-117	1.15193	0.03537	0.12555	0.00228	0.322651	92.6488		823	61.73	762.5	13.06	0.615271
MR14-118	1.16128	0.03379	0.12831	0.00227	0.354578	97.9361		794.6	57.99	778.2	12.94	0.892328
MR14-119	1.20342	0.02653	0.13062	0.00209	0.490394	95.0859		832.3	41.05	791.4	11.91	0.583685
MR14-120	1.09258	0.02214	0.11991	0.00188	0.539869	90.2361		809.1	36.63	730.1	10.81	0.915065
